# Supplementary material
Source: Royal Society of Chemistry journal article supplement (doi:10.1039/d6ta01693f)
Supplement: d6ta01693f1.pdf [file d6ta01693f1.pdf]

**"Rock-solid" CoB-based sponge electrodes for overall seawater  
splitting at industrial-level current density**

Yiming Wang<sup>a,b#</sup>, Liugang Wu<sup>a,b#</sup>, Jiacheng Zhang<sup>a,b#</sup>, Jiahao Zhao<sup>b</sup>, Longsheng Wu<sup>b</sup>,  
Meng Yu<sup>d</sup>, Yuqin Wang<sup>b</sup>, Shuo Weng<sup>b</sup>, Lu-Man Jiang<sup>c\*</sup>, Weiju Hao<sup>a,b\*</sup>

<sup>a</sup>Pudong Gongli Hospital, Shanghai University of Medicine & Health Sciences,  
Shanghai 200135, China.

<sup>b</sup>School of Materials and Chemistry University of Shanghai for Science and  
Technology. Shanghai 201209, P. R. China.

<sup>c</sup>Shanghai University of Electric Power, Shanghai 200090, China

<sup>d</sup>Key Laboratory of Advanced Energy Materials Chemistry (Ministry of  
Education), Nankai University, Tianjin 300071, China

**E-mail:** [jiangluman@shiep.edu.cn](mailto:jiangluman@shiep.edu.cn); [wjhao@usst.edu.cn](mailto:wjhao@usst.edu.cn)

## 1.1. (Preparation of Other Elements (Ni, P and Fe)-Doped CoB-Based Electrodes)

Table 1 shows the conditions and reagent consumption of CoB-based electrodes.

Table 1. Conditions and reagent consumption of CoB-based electrodes.

| Electrodes | CoNiB@HPS <sup>a)</sup>                                                                                                              | CoFeB@HPS <sup>b)</sup>                                                                            | CoFeNiB@HPS <sup>c)</sup>                                                                                           | CoPB@HPS <sup>d)</sup>                                          |
|------------|--------------------------------------------------------------------------------------------------------------------------------------|----------------------------------------------------------------------------------------------------|---------------------------------------------------------------------------------------------------------------------|-----------------------------------------------------------------|
|            | (NH <sub>4</sub> ) <sub>2</sub> SO <sub>4</sub> (1.50 g), HOC(COONa)(CH <sub>2</sub> COONa) <sub>2</sub> ·2H <sub>2</sub> O (1.50 g) |                                                                                                    |                                                                                                                     |                                                                 |
|            | CoSO <sub>4</sub> ·7H <sub>2</sub> O<br>4.00 g                                                                                       | CoSO <sub>4</sub> ·7H <sub>2</sub> O<br>6.00 g                                                     | CoSO <sub>4</sub> ·7H <sub>2</sub> O<br>3.00 g                                                                      | CoSO <sub>4</sub> ·7H <sub>2</sub> O<br>8.00 g                  |
| Reagents   | NiSO <sub>4</sub> ·6H <sub>2</sub> O<br>4.00 g                                                                                       | (NH <sub>4</sub> ) <sub>2</sub> Fe(SO <sub>4</sub> ) <sub>2</sub> ·6<br>H <sub>2</sub> O<br>1.50 g | NiSO <sub>4</sub> ·6H <sub>2</sub> O<br>3.00 g                                                                      | NaH <sub>2</sub> PO <sub>2</sub> ·H <sub>2</sub><br>O<br>1.50 g |
|            | DMAB<br>4.40g                                                                                                                        | DMAB<br>4.40g                                                                                      | (NH <sub>4</sub> ) <sub>2</sub> Fe(SO <sub>4</sub> ) <sub>2</sub> ·6<br>H <sub>2</sub> O<br>1.50 g<br>DMAB<br>4.40g | DMAB<br>3.70g                                                   |
| Conditions | 100 mL H <sub>2</sub> O, 10 h, 273 K                                                                                                 |                                                                                                    |                                                                                                                     |                                                                 |

a) In the CoNiB@HPS sample, the molar content of nickel element is equal to that of Co element; b) In the CoFeB@HPS sample, the molar content of iron element is 15% of that of Co element; c) In the CoFeNiB@HPS sample, the molar content of iron element is 15% of the sum of Co and nickel elements; d) In the CoPB@HPS sample, the molar content of P element is 20% of that of B element.

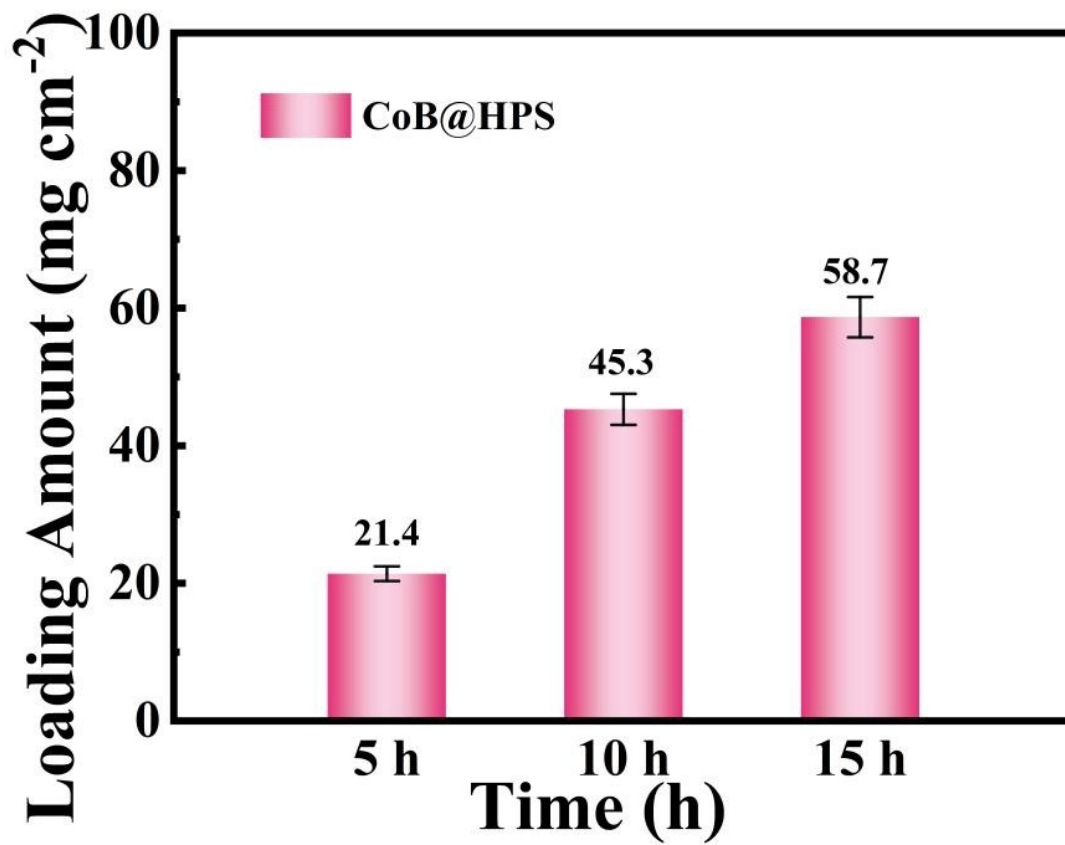

Figure S1. The loading amount of CoB@HPS under different electroless plating time.

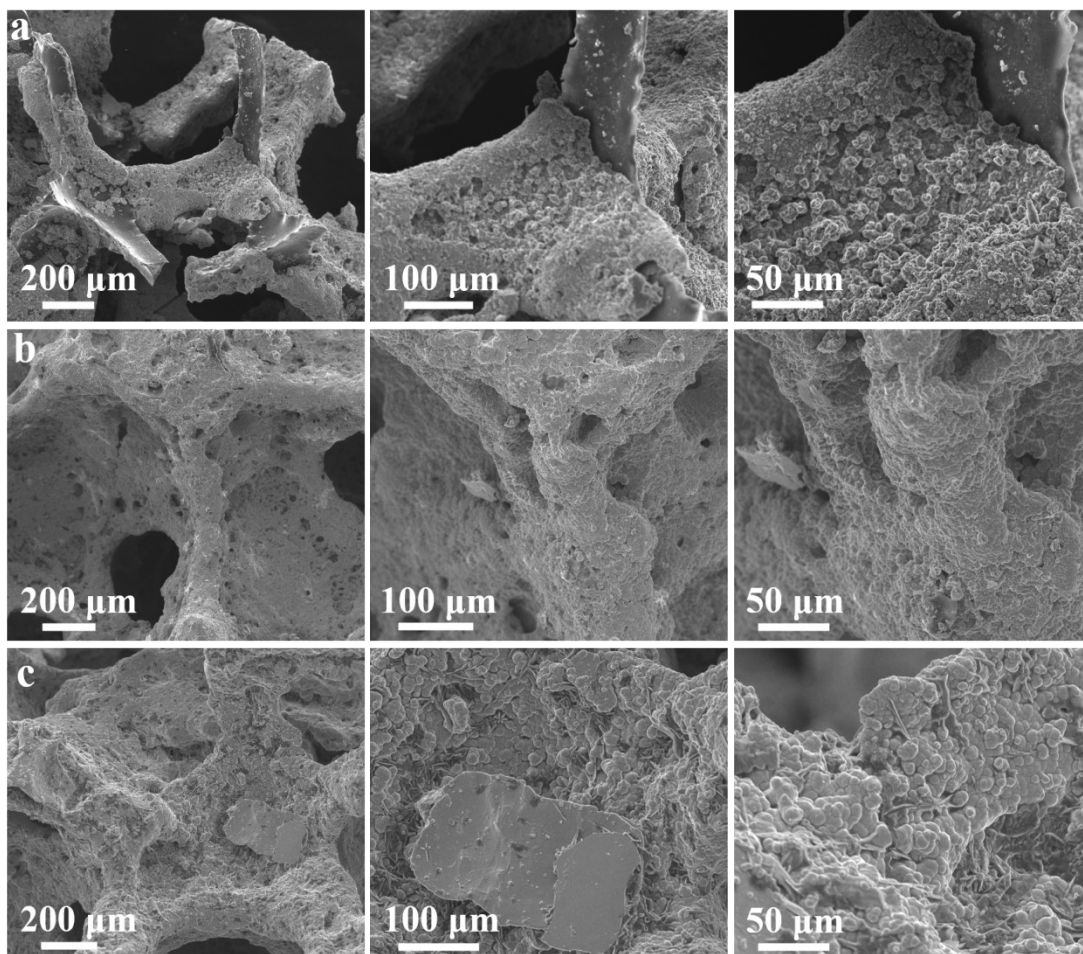

**Figure S2.** SEM images of (a) CoB@HPS-5 h; (b) CoB@HPS-10 h and (c) CoB@HPS-15 h under different magnifications.

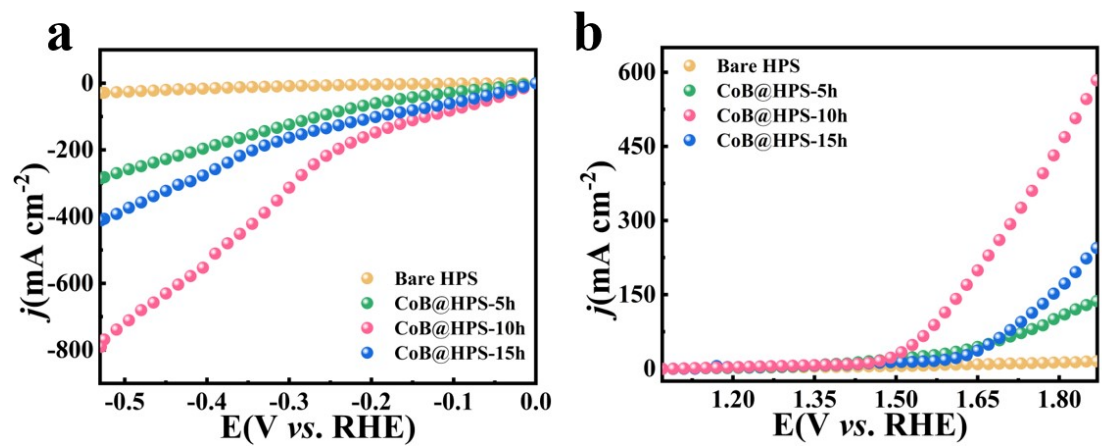

**Figure S3.** LSV curves of CoB@HPS under different plating time during (a) HER process and (b) OER processes in 1.0 M KOH + 0.5 M KOH.

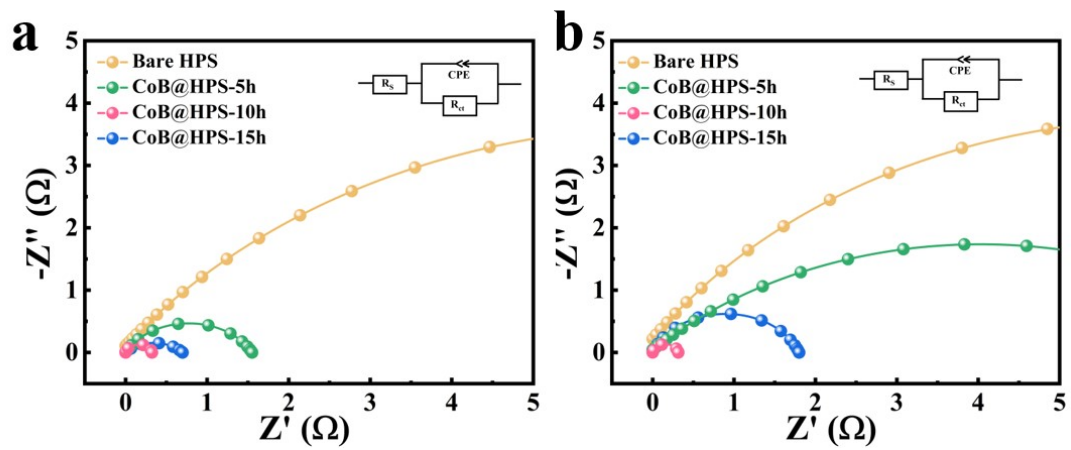

**Figure S4.** Nyquist plots of CoB@HPS under different plating time during (a) HER process and (b) OER processes in 1.0 M KOH + 0.5 M KOH.

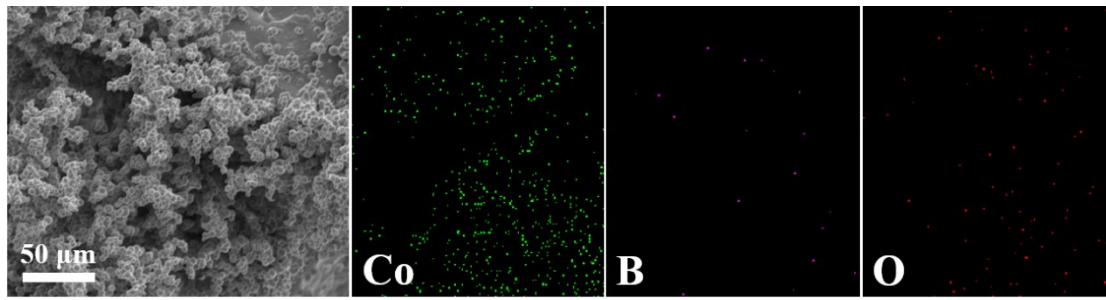

**Figure S5.** SEM Energy Dispersive X-ray spectroscopy (EDS) elements mapping of CoB@HPS

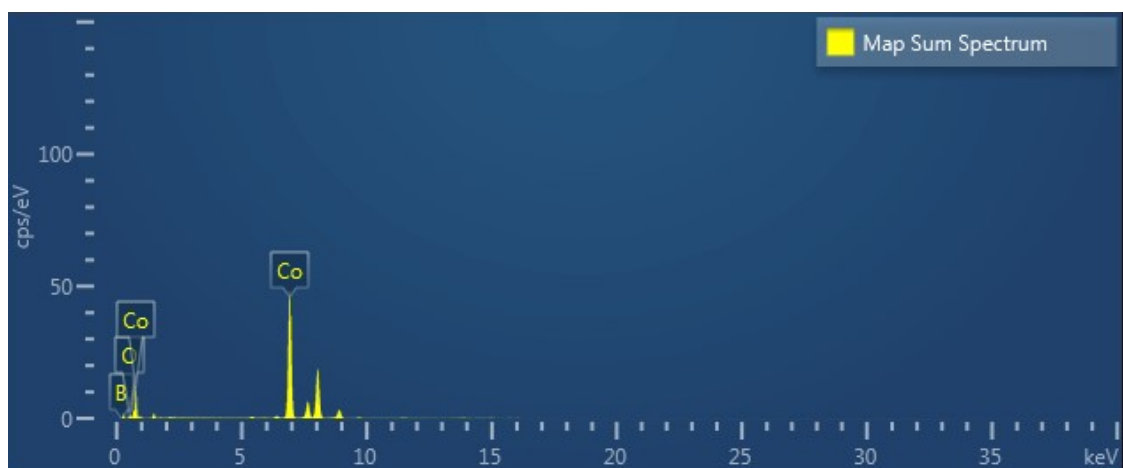

**Figure S6.** Dark-field scanning transmission electron microscopy combined with energy dispersive X-ray spectroscopy (HAADF-STEM-EDX) results of CoB@HPS.

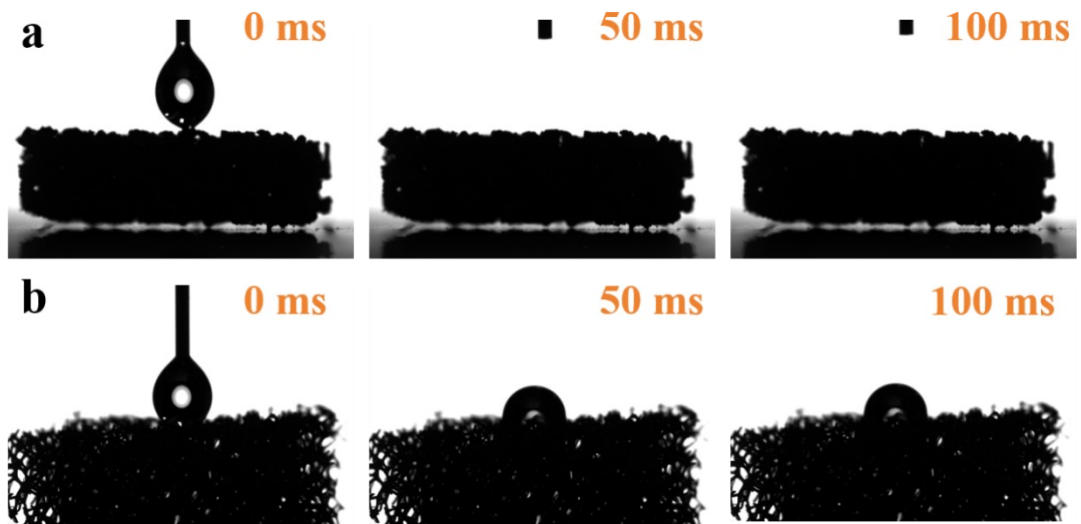

**Figure S7.** Contact angle images of (a) CoB@HPS and (b) Bare HPS.

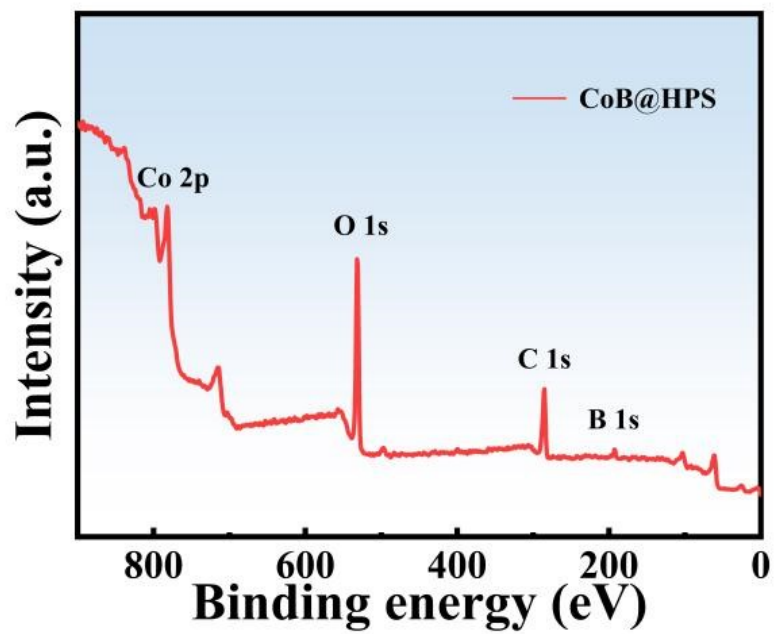

**Figure S8.** Full XPS survey spectra for CoB@HPS electrode.

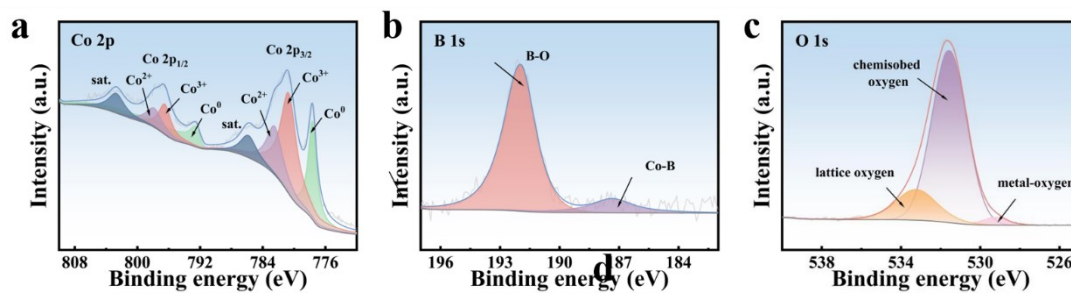

**Figure S9.** High-resolution XPS results of (a) Co 2p; (b) B 1s and (c) O 1s.

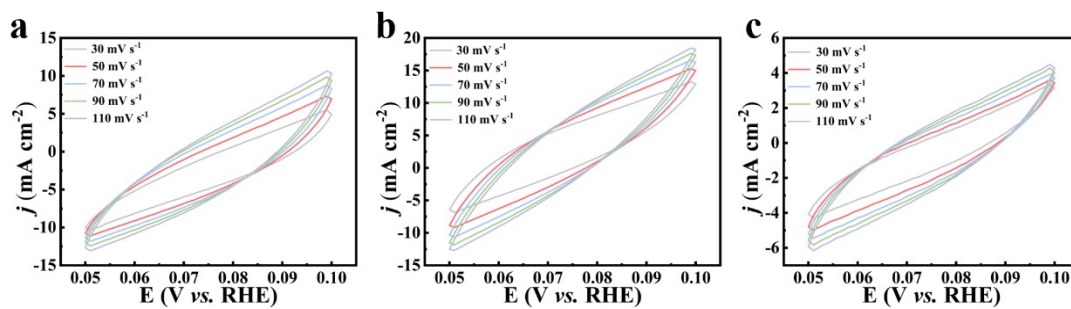

**Figure S10.** CV curves within a non-faradaic reaction region from 0.05-0.10 V (vs. RHE) at different scan rates toward HER process for (a) CoB@HPS; (b) CoB@HA and (c) CoB@NF.

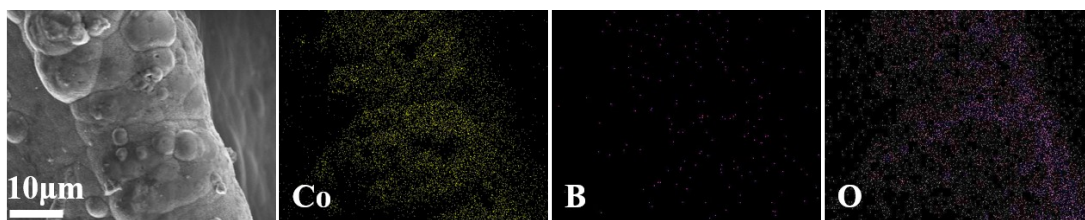

**Figure S11.** SEM images and corresponding elemental mapping of CoB@HPS after HER stability test in 1.0 M KOH + 0.5 M NaCl.

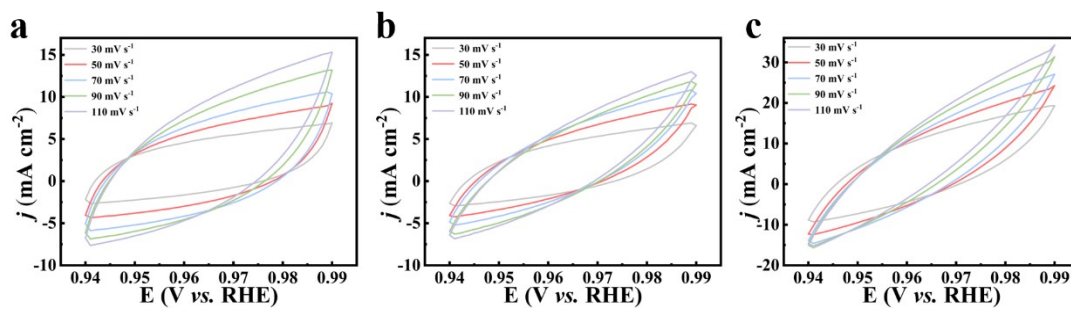

**Figure S12.** CV curves within a non-faradaic reaction region from 0.94-0.99 V (vs. RHE) at different scan rates toward OER process for (a) CoB@HPS; (b) CoB@HA and (c) CoB@NF.

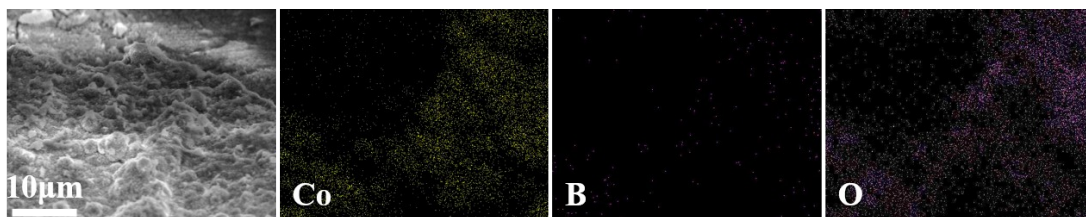

**Figure S13.** SEM images and corresponding elemental mapping of CoB@HPS after OER stability test in 1.0 M KOH + 0.5 M NaCl.

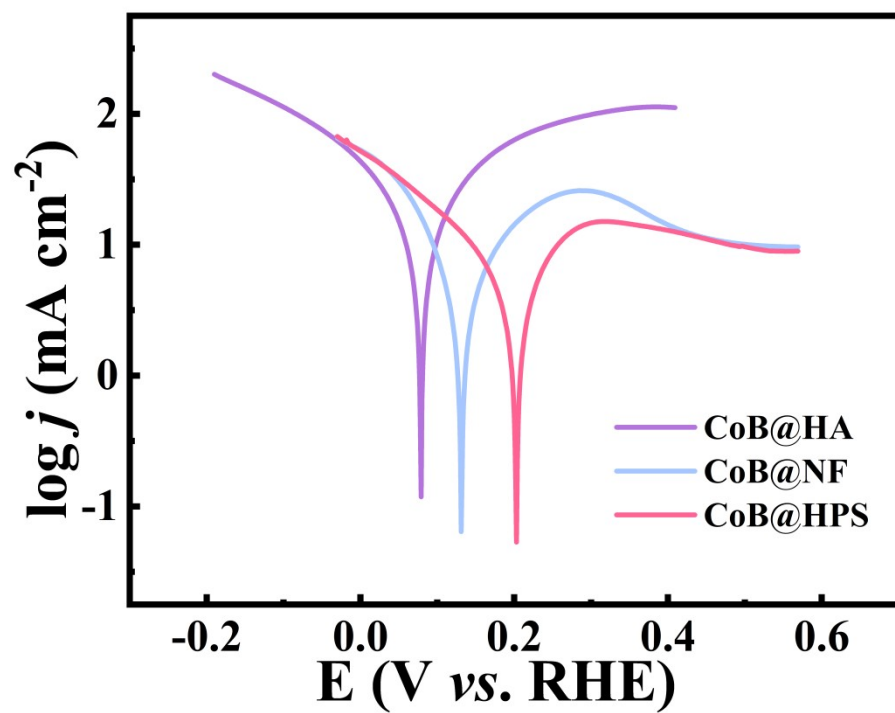

Figure S14. Tafel plots of CoB@HA, CoB@NF and CoB@HPS.

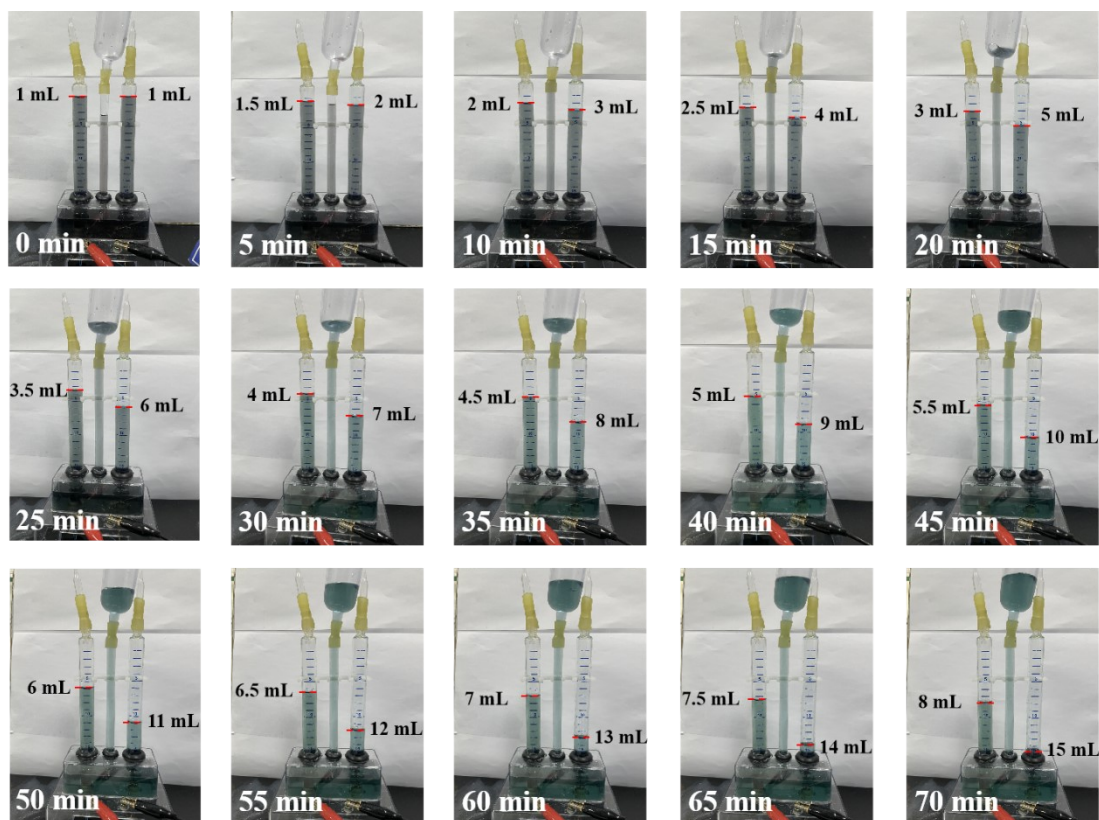

**Figure S15.** Photographs of gas generation amount (H<sub>2</sub> and O<sub>2</sub>) collected per 5 min at the current density of 500 mA cm<sup>-2</sup>.

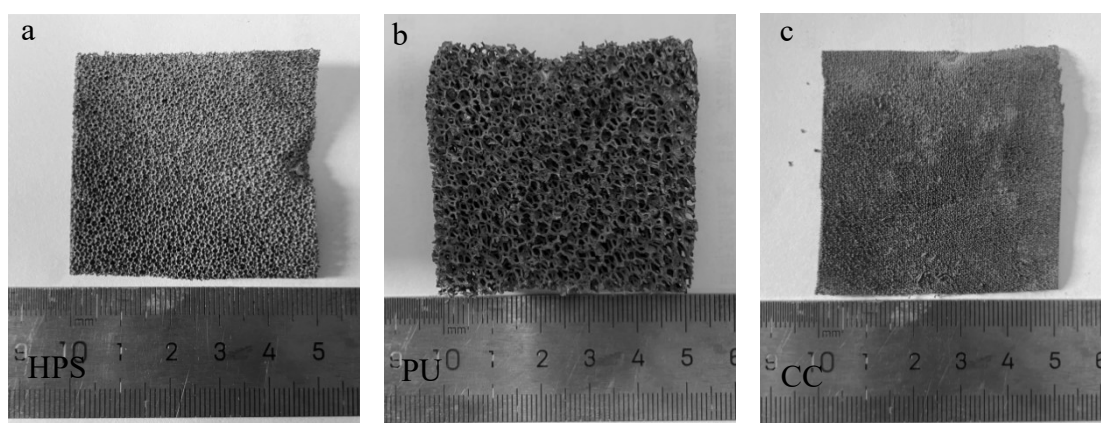

**Figure S16.** Large area ( $5\text{cm} \times 5\text{cm}$ ) preparation of CoB on different substrates (HPS, PU, CC)

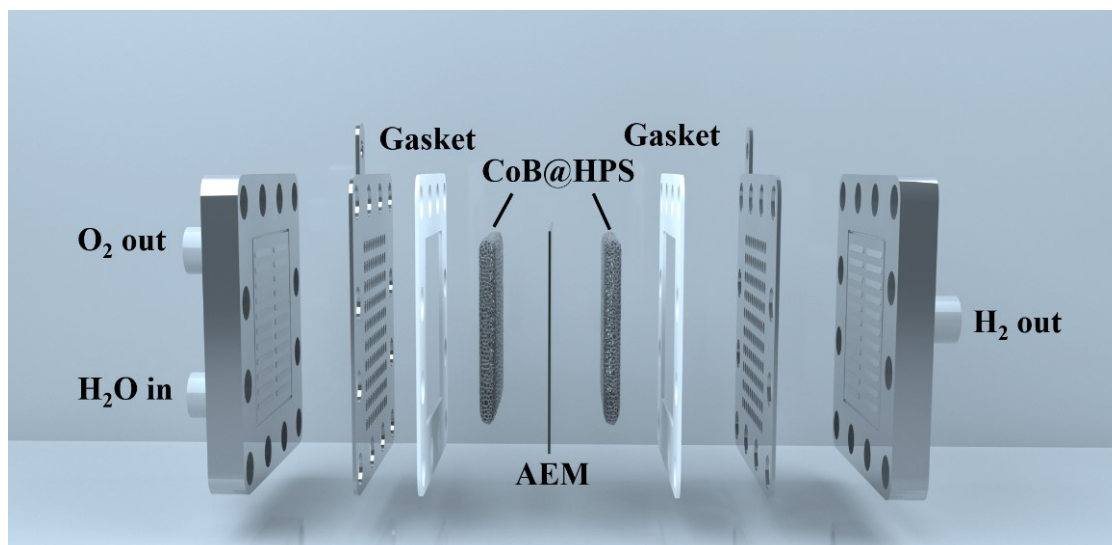

Figure S17.

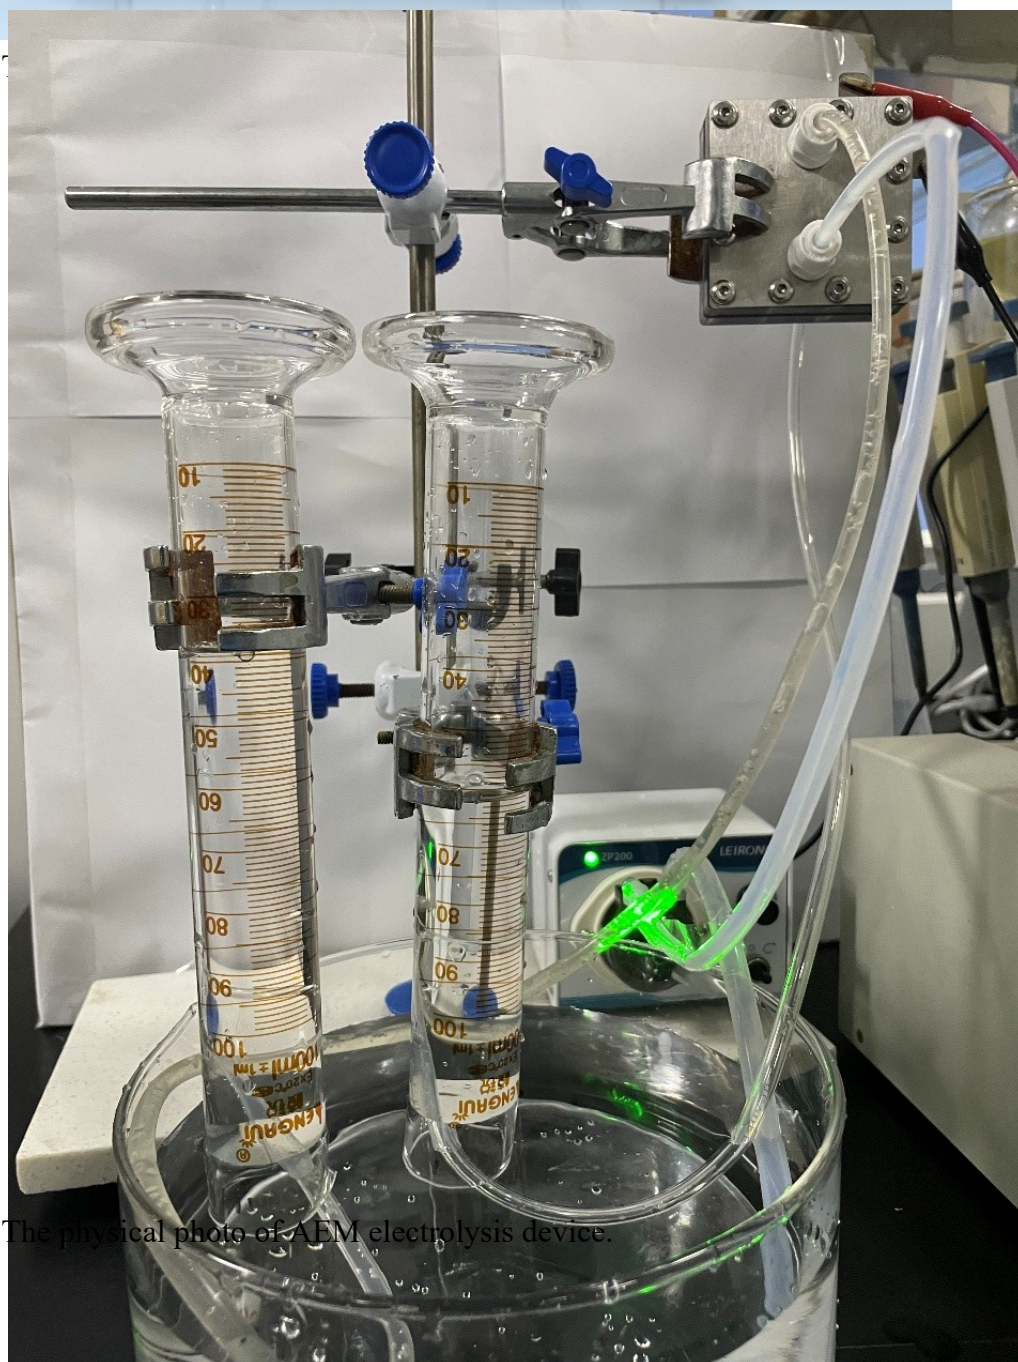

Figure S18. The physical photo of AEM electrolysis device.

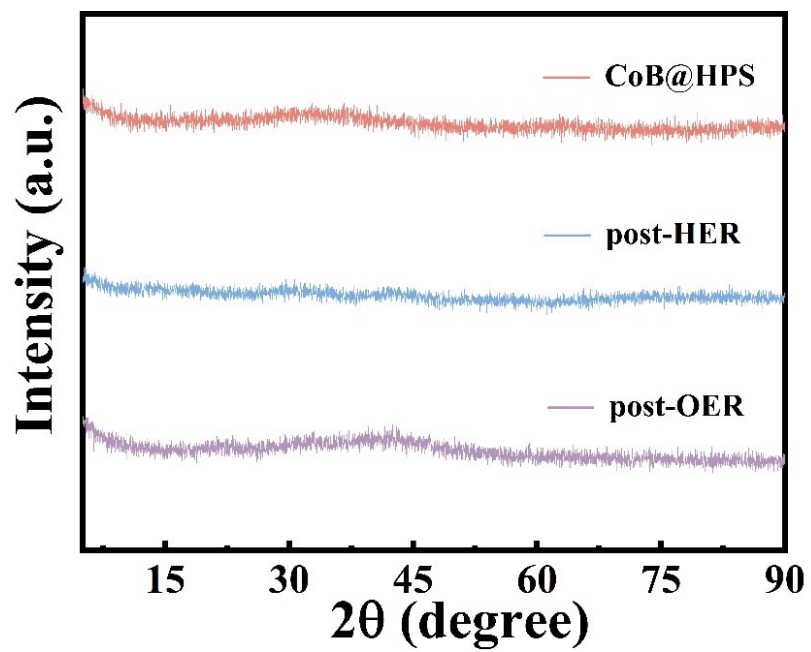

**Figure S19.** XRD patterns of CoB@HPS, post-HER and post-OER.

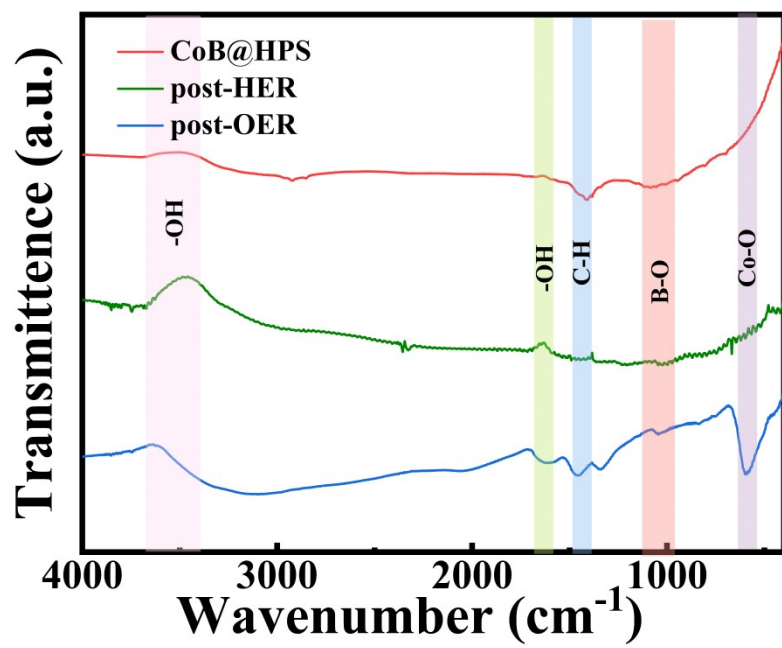

Figure S20. FT-IR spectra of initial sample, post-HER, and post-OER.

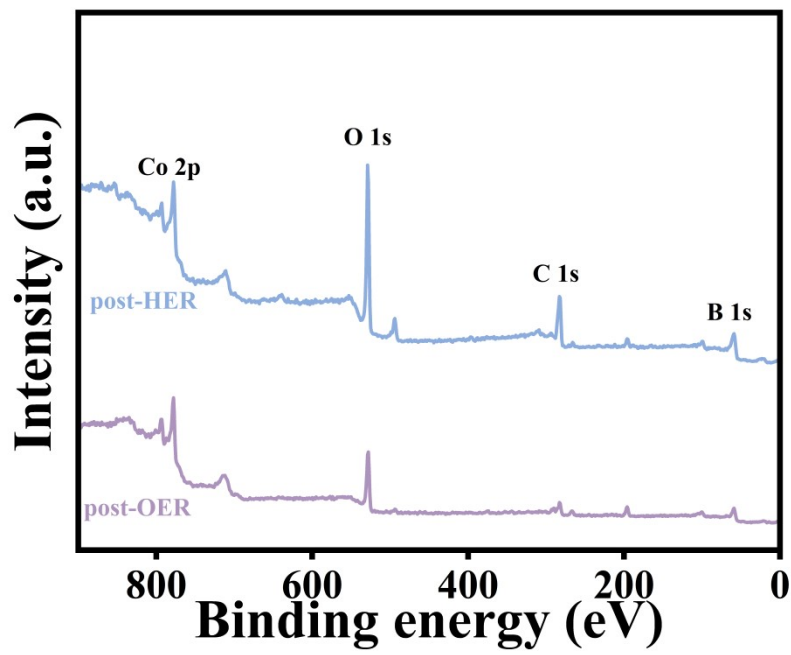

Figure S21. Full XPS survey spectra of post-HER and post-OER.

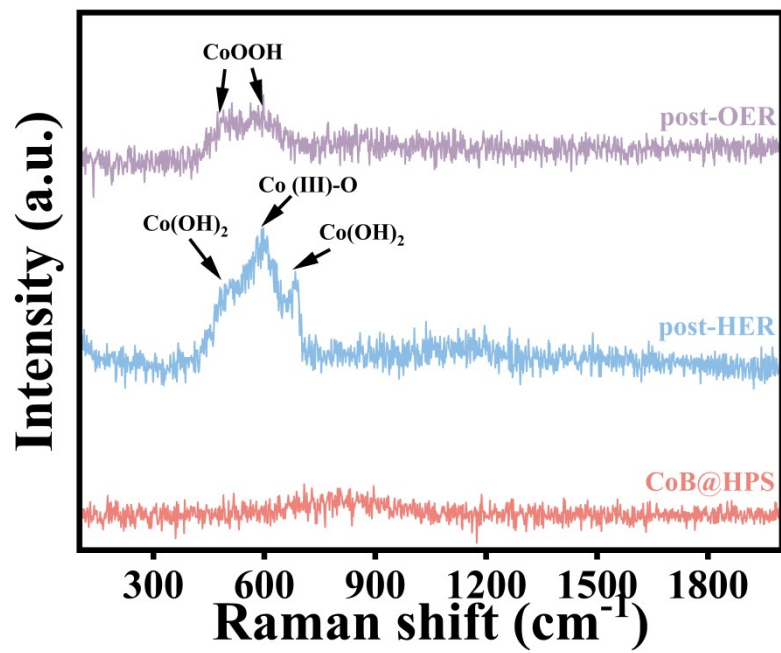

**Figure S22.** Raman spectrum of initial sample, post-HER, and post-OER.

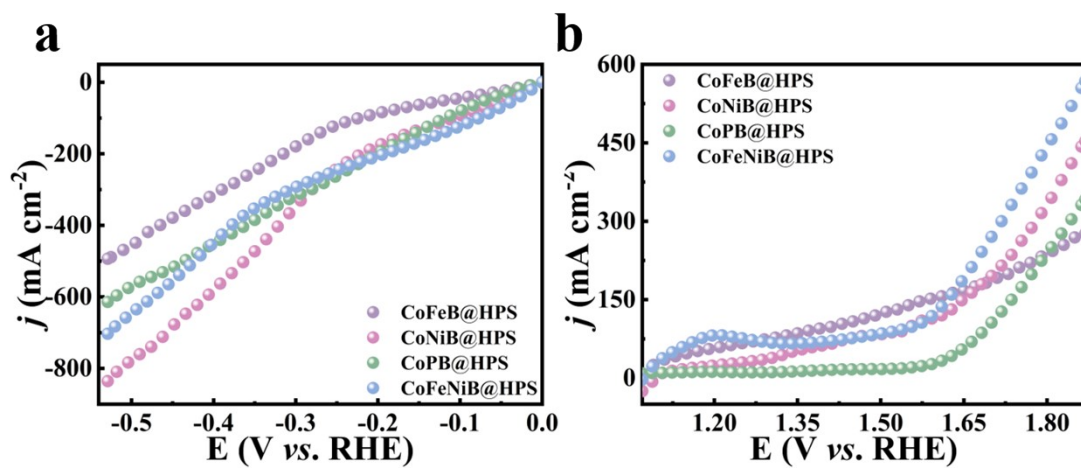

**Figure S23.** Uncorrected infrared LSV curves of CoFeB@HPS, CoNiB@HPS, CoPB@HPS, and CoFeNiB@HPS for HER (a) and OER (b) processes.

**Table S1.** Comparison of costs between HPS and other metal substrates

| <b>Substrate</b> | <b>Size (cm<sup>2</sup>)</b> | <b>Price (\$)</b> | <b>Price per unit area (\$ cm<sup>-2</sup>)</b> |
|------------------|------------------------------|-------------------|-------------------------------------------------|
| HPS              | 100*100                      | 1.73              | 0.00017                                         |
| Iron foam        | 10*10                        | 8.13              | 0.0813                                          |
| Nickel foam      | 20*30                        | 3.91              | 0.0065                                          |
| Cobalt foam      | 10*10                        | 130.84            | 1.308                                           |
| Copper foam      | 10*10                        | 5.07              | 0.0507                                          |
| Titanium foam    | 10*10                        | 72.42             | 0.7242                                          |

**Table S2.** Comparison the HER performance of CoB@HPS with other electrocatalysts.

| Catalyst                                               | Overpotential ( $\eta_{10}$ , mV) | Electrolyte                          | References       |
|--------------------------------------------------------|-----------------------------------|--------------------------------------|------------------|
| <b>CoB@HPS</b>                                         | <b>19</b>                         | <b>1.0 M KOH + 0.5 M NaCl</b>        | <b>This work</b> |
| Ru@FeCo-Ni(OH) <sub>2</sub>                            | 40                                | 1.0 M KOH + seawater                 | 1                |
| Cr-Co <sub>x</sub> P                                   | 100                               | 1.0 M KOH                            | 2                |
| MnCo/NiSe/NF                                           | 22.1                              | 1.0 M KOH                            | 3                |
| Co <sub>3</sub> Mo <sub>3</sub> N/Co <sub>4</sub> N/Co | 78                                | 1.0 M KOH                            | 4                |
| Co <sub>2</sub> P-MoS <sub>2</sub> @NiO/CC             | 54.3                              | 1.0 M KOH                            | 5                |
| P-Co/Co(OH) <sub>2</sub>                               | 36.7                              | 1.0 M KOH                            | 6                |
| PHCo/MoO <sub>2</sub> @C                               | 59                                | 1.0 M KOH                            | 7                |
| CoN/VN@NF                                              | 55                                | 1.0 M KOH                            | 8                |
| RuSAs@NiCoP/NF                                         | 8                                 | 1.0 M KOH                            | 9                |
| CoP/rGO@Ti                                             | 103                               | 1.0 M KOH                            | 10               |
| B-Os                                                   | 7                                 | 1.0 M KOH + seawater                 | 11               |
| B-Co <sub>x</sub> P                                    | 11                                | 1.0 M KOH + 0.5 M NaCl               | 12               |
| Ru-BO <sub>x</sub> -OH-300                             | 22                                | 1.0 M KOH                            | 13               |
| NixB/Mo <sub>0.8</sub> B <sub>3</sub> (NMB)            | 15                                | 1.0 M KOH                            | 14               |
| IrB <sub>1.15</sub>                                    | 12                                | 0.5 M H <sub>2</sub> SO <sub>4</sub> | 15               |
| FeCoNiCuMoB HEA                                        | 26                                | 1.0 M KOH                            | 16               |
| B-Rh@NC                                                | 26                                | 1.0 M KOH                            | 17               |
| Ni-Fe-Ce-B/MS                                          | 40                                | 1.0 M KOH + 0.5 M NaCl               | 18               |
| Co-W-B                                                 | 97                                | 1 M KOH                              | 19               |

**Table S3.** Comparison the OER performance of Co-B@HPS with other electrocatalysts in 1.0 M KOH + 0.5 M NaCl

| Catalyst                                               | Overpotential ( $\eta_{10}$ , mV) | Electrolyte                   | References       |
|--------------------------------------------------------|-----------------------------------|-------------------------------|------------------|
| <b>CoB@HPS</b>                                         | <b>199</b>                        | <b>1.0 M KOH + 0.5 M NaCl</b> | <b>This work</b> |
| Ru@FeCo-Ni(OH) <sub>2</sub>                            | 266                               | 1.0 M KOH + seawater          | 1                |
| MoO <sub>3</sub> @CoO/CC                               | 298                               | 1.0 M KOH + 0.5 M NaCl        | 20               |
| MnCo/NiSe/NF                                           | 225.8                             | 1.0 M KOH                     | 3                |
| Co <sub>3</sub> Mo <sub>3</sub> N/Co <sub>4</sub> N/Co | 220                               | 1.0 M KOH                     | 4                |
| Co,P-MoS <sub>2</sub> @NiO/CC                          | 160                               | 1.0 M KOH                     | 5                |
| CeO <sub>2</sub> /Fe-Co(OH) <sub>2</sub>               | 189                               | 1.0 M KOH                     | 21               |
| CoFePBA/Co <sub>2</sub> P                              | 257                               | 1.0 M NaOH + 0.5 M NaCl       | 22               |
| CoOOH/Co <sub>9</sub> S <sub>8</sub>                   | 240                               | 1.0 M KOH                     | 23               |
| RuSAs@NiCoP/NF                                         | 222                               | 1.0 M KOH                     | 9                |
| CFMO-2                                                 | 217                               | 1.0 M KOH                     | 24               |
| Fe <sub>3</sub> Co <sub>7</sub> -B/CNT                 | 265                               | 1.0 M KOH                     | 25               |
| BMO-750                                                | 297                               | 1.0 M KOH                     | 26               |
| Ru-BO <sub>x</sub> -OH-300                             | 235                               | 1.0 M KOH                     | 13               |
| NixB/Mo <sub>0.8</sub> B <sub>3</sub> (NMB)            | 170                               | 1.0 M KOH                     | 14               |
| IrB <sub>1.1</sub>                                     | 248                               | 1.0 M KOH                     | 27               |
| FeCoNiCuMoB HEA                                        | 201                               | 1.0 M KOH                     | 16               |
| B-(Ni,Fe)OOH/Ni <sub>3</sub> N/NF                      | 213                               | 1.0 M KOH+ seawater           | 28               |
| Ni-Fe-Ce-B/MS                                          | 208                               | 1.0 M KOH + 0.5 M NaCl        | 18               |
| MEB                                                    | 248                               | 1.0 M KOH + 0.5 M NaCl        | 29               |

**Table S4.** The OWS performance for Co-B@HPS electrode and other electrocatalysts in 1.0 M KOH + 0.5 M NaCl

| Catalyst                                                                       | Voltage ( $V_{100}, V$ ) | Electrolyte                   | References       |
|--------------------------------------------------------------------------------|--------------------------|-------------------------------|------------------|
| <b>CoB@HPS  CoB@HPS</b>                                                        | <b>1.60</b>              | <b>1.0 M KOH + 0.5 M NaCl</b> | <b>This work</b> |
| Ru@FeCo-Ni(OH) <sub>2</sub>   Ru@FeCo-Ni(OH) <sub>2</sub>                      | 1.68                     | 1.0 M KOH + seawater          | 1                |
| Cr-Co <sub>x</sub> P  Cr-Co <sub>x</sub> P                                     | 1.85                     | 1.0 M KOH + seawater          | 2                |
| MnCo/NiSe/NF  MnCo/NiSe/NF                                                     | 1.86                     | 1.0 M KOH + seawater          | 3                |
| Ni <sub>4</sub> Mo/MoO <sub>2</sub> /Ni  NiFeCr-aee/bee                        | 1.51                     | 1.0 M KOH                     | 30               |
| Fe-P-CMO  Fe-P-CMO                                                             | 1.59                     | 1.0 M KOH                     | 31               |
| Pt@NiFeCo-E  Pt@NiFeCo-E                                                       | 1.71                     | 1.0 M KOH + 0.5 M NaCl        | 32               |
| NiMoN/Ni <sub>3</sub> S <sub>2</sub>   NiMoN/Ni <sub>3</sub> S <sub>2</sub>    | 1.63                     | 1.0 M KOH + seawater          | 33               |
| NiTe@FeOOH  NiTe@FeOOH                                                         | 1.79                     | 1.0 M KOH + seawater          | 34               |
| RuSAs@NiCoP/NF  RuSAs@NiCoP/NF                                                 | 1.57                     | 1.0 M KOH                     | 9                |
| Mo-NiP@NF  Mo-NiP@NF                                                           | 1.63                     | 1.0 M KOH + 0.5 M NaCl        | 35               |
| Ni <sub>4</sub> Mo/MoO <sub>2</sub> /C  Ni <sub>4</sub> Mo/MoO <sub>2</sub> /C | 1.76                     | 1.0 M KOH + seawater          | 36               |
| Ni-Fe-Ce-B/MS  Ni-Fe-Ce-B/MS                                                   | 1.64                     | 1.0 M KOH + 0.5 M NaCl        | 18               |
| FeNiCoCrRu  FeNiCoCrRu                                                         | 1.81                     | 1.0 M KOH + 0.5 M NaCl        | 37               |
| CoFe-Ni <sub>2</sub> P  CoFe-Ni <sub>2</sub> P                                 | 1.72                     | 1.0 M KOH + seawater          | 38               |

## References

- 1 J. Lu, Z. Yu, X. Wei, X. Zhang, X. Wang, K. Liu, Y. Cai, H. Pan, D. Liu and Z. Wang, *Adv. Mater.*, 2025, **38**, 202515156.
- 2 Y. Y. Song, M. Z. Sun, S. C. Zhang, X. Y. Zhang, P. Yi, J. Z. Liu, B. L. Huang, M. H. Huang and L. X. Zhang, *Adv. Funct. Mater.*, 2023, **33**, 202214081.
- 3 R. Andaveh, A. Sabour Rouhaghdam, J. Ai, M. Maleki, K. Wang, A. Seif, G. Barati Darband and J. Li, *App. Catal. B: Environ.*, 2023, **325**, 122355.
- 4 Y. Liu, L. Wang, R. Hübner, J. Kresse, X. Zhang, M. Deconinck, Y. Vaynzof, I. M. Weidinger and A. Eychmüller, *Angew. Chem. Int. Ed.*, 2024, **63**, e202319239.
- 5 H. Li, J. Xia, J. Zheng, X. Bai, Q. Ren, W. Hao, Q. Bi, G. Li and J. Fan, *Adv. Funct. Mater.*, 2025, 202525383.
- 6 Y. Liu, H. You, C. Bai, J. Yu, E. Hu, D. Zhao, J. Zhang and Z. Chen, *Adv. Energy Mater.*, 2025, **15**, 202503695.
- 7 T. Zhang, L. Hang, Q. Liu, S. Tao, H. Bao and H. J. Fan, *Adv. Mater.*, 2024, **36**, 202405386.
- 8 Z. J. Liang, D. Shen, Y. Wei, F. F. Sun, Y. Xie, L. Wang and H. G. Fu, *Adv. Mater.*, 2024, **36**, 202408634.
- 9 J. Fan, J. Xia, H. Wang, H. Li, Y. Tao, G. Wang, W. Hao, Q. Bi, G. Li, X. Shen and L. Ai, *Adv. Energy Mater.*, 2025, **15**, 202501995.
- 10 X. Xu, Y. Lu, J. Shi, X. Hao, Z. Ma, K. Yang, T. Zhang, C. Li, D. Zhang, X. Huang and Y. He, *Nat. Commun.*, 2023, **14**, 7708.
- 11 X. Fu, H. Li, Y. Zong, W. Xiao, J. Wang, H. Li, T. Ma, Z. Wu and L. Wang, *Angew. Chem. Int. Ed.*, 2025, **64**, e202512710

- 12 K. Lang, Y. Gao, Q. Li, M. Liu, B. Liu, J. Liu, X. Xiao, Z. Li, H. Meng and B. Jiang, *Carbon Energy*, 2025, **7**, e70056.
- 13 J. P. Sun, S. Zhou, Z. Zhao, S. Y. Qin, X. C. Meng, C.-H. Tung and L.-Z. Wu, *Energy Environ. Sci.*, 2025, **18**, 1952-1962.
- 14 M. Rafiq, K. Harrath, M. J. Feng, R. Li, A. R. Woldu, P. K. Chu, L. S. Hu, F. S. Lu and X. D. Yao, *Adv. Energy Mater.*, 2024, **14**, 2402866.
- 15 T. T. Liu, Z. S. Chen, S. i. Liu, P. Wang, Z. H. Pu, G. X. Zhang and S. H. Sun, *Angew. Chem. Int. Ed.*, 2024, **64**, e202414021.
- 16 S. Wang, H. Yan, W. Huo, A. Davydok, M. Zając, J. Stępień, H. Feng, Z. Xie, J. K. Shang, P. H. C. Camargo, J. Jiang and F. Fang, *App. Catal. B: Environ.*, 2025, **363**, 124791.
- 17 Q. Yu, Y. Fu, J. Zhao, B. Li, X. Wang, X. Liu and L. Wang, *App. Catal. B: Environ.*, 2023, **324**, 122297.
- 18 H. X. Liu, X. Zhou, C. M. Ye, M. X. Ye and J. F. Shen, *App. Catal. B: Environ.*, 2024, **343**, 123560.
- 19 A. Chunduri, A. Bhide, S. Gupta, K. H. Mali, B. R. Bhagat, A. Dashora, M. Spreitzer, R. Fernandes, R. Patel and N. Patel, *ACS Applied Energy Materials*, 2023, **6**, 4630-4641.
- 20 L. Zhou, D. Guo, L. Wu, Z. Guan, C. Zou, H. Jin, G. Fang, X. a. Chen and S. Wang, *Nat. Commun.*, 2024, **15**, 2481.
- 21 Z. Li, J. Yi, Y. Tang, Z. Zhang, C. Li, R. Bao and J. Wang, *Energy Environ. Sci.*, 2025, **18**, 7188-7202.
- 22 W. Liu, J. Yu, M. G. Sendeku, T. Li, W. Gao, G. Yang, Y. Kuang and X. Sun, *Angew. Chem. Int. Ed.*, 2023, **62**, e202309882.

- 23 N. Yao, G. Wang, H. Jia, J. Yin, H. Cong, S. Chen and W. Luo, *Angew. Chem. Int. Ed.*, 2022, **61**, e202117178.
- 24 B. Yao, Y. Chen, Y. Yan, Y. Yang, H. Xing, Y. Xu, D. Jiao, Z. Xing, D. Wang and X. Yang, *Angew. Chem. Int. Ed.*, 2024, **64**, e202416141.
- 25 J. M. V. Nsanzimana, L. Gong, R. Dangol, V. Reddu, V. Jose, B. Y. Xia, Q. Yan, J. M. Lee and X. Wang, *Adv. Energy. Mater.*, 2019, **9**, 201901503.
- 26 J. Bai, J. Mei, D. Qi, T. Liao and Z. Sun, *ACS Catal.*, 2023, **13**, 11305-11313.
- 27 D. Chen, R. Yu, H. Zhao, J. Jiao, X. Mu, J. Yu and S. Mu, *Angew. Chem. Int. Ed.*, 2024, **63**, e202407577.
- 28 X. Xiao, Y. Wei, S. Song, B. McElhenny, F. Zhang, X. Jiang, Y. Zhang, S. Chen, M. Wang, Y. Shen and Z. Ren, *App. Catal. B: Environ.*, 2024, **349**, 123871.
- 29 S. Chen, H. Zhang, L. Wu, S. Zheng, Y. Li, L. Li, C. Sun and B. An, *Nano Energy*, 2025, **145**, 111454.
- 30 W. Zhang, X. He, P. Pan, J. Wang, L. Liu, L. Hou, X. Fan, X. Lu, X. Yu and X. Li, *Energy Environ. Sci.*, 2025, **18**, 8697-8707.
- 31 B. Wang, X. Chen, Y. He, Q. Liu, X. Zhang, Z. Luo, J. V. Kennedy, J. Li, D. Qian, J. Liu and G. I. N. Waterhouse, *App. Catal. B: Environ.*, 2024, **346**, 123741.
- 32 P. Zhang, M. Gan, Y. Song, P. Liu, H. Liang, Y. Shen, B. Xu, T. Liao, J. Guo and Z. Sun, *App. Catal. B: Environ.*, 2024, **355**, 124214.
- 33 L. L. Ma, Y. R. Hao, J. Sun, Y. Chen, C. Li, H. Xue, J. Sun, Q. Wang and L. Wu, *Adv. Funct. Mater.*, 2024, **35**, 2409924.

- 34 X. Gao, J. Chen, Y. Yu, F. Wang, X. Wu, X. Wang, W. Mao, J. Li, W. Huang, Q. Chen, R. Li, C. You, S. Wang, X. Tian and Z. Kang, *Chem. Eng. J.*, 2023, **474**, 145568.
- 35 W. J. Hao, X. W. Ma, L. C. Wang, Y. H. Guo, Q. Y. Bi, J. C. Fan, H. X. Li and G. S. Li, *Adv. Energy. Mater.*, 2024, **15**, 2403009.
- 36 H. T. Dao, S. Sidra, V. H. Hoa, T. V. Tran, Q. H. Nguyen, P. K. L. Tran, M. Mai, S.-K. Kim, J. Kim and D. H. Kim, *App. Catal. B: Environ.*, 2026, **386**, 126398.
- 37 Y. Xie, S. Xu, A. C. Meng, B. Zheng, Z. Chen, J. M. Tour and J. Lin, *Energy Environ. Sci.*, 2024, **17**, 8670-8682.
- 38 C. Q. Huang, Q. C. Zhou, L. Yu, D. S. Duan, T. Y. Cao, S. H. Qiu, Z. Z. Wang, J. Guo, Y. X. Xie, L. P. Li and Y. Yu, *Adv. Energy. Mater.*, 2023, **13**, 2301475.
